# Supplementary material for: Comparison of Rheological, Drug Release, and Mucoadhesive Characteristics upon Storage between Hydrogels with Unmodified or Beta-Glycerophosphate-Crosslinked Chitosan
Source: Hindawi journal article supplement (doi:10.1155/2018/3592843), 2018-09-19
Supplement: f1 [file 3592843.f1.pdf]

## SUPPLEMENTARY MATERIAL

Research article

### **Comparison of rheological, drug release and mucoadhesive characteristics upon storage between hydrogels with unmodified or beta-glycerophosphate crosslinked chitosan**

Szymańska Emilia, Czajkowska-Kośnik Anna, Winnicka Katarzyna

*Department of Pharmaceutical Technology, Faculty of Pharmacy, Medical University of Białystok, Mickiewicza 2c, Białystok 15-222, Poland*

*Correspondence should be addressed to Emilia Szymańska; esz@umb.edu.pl*

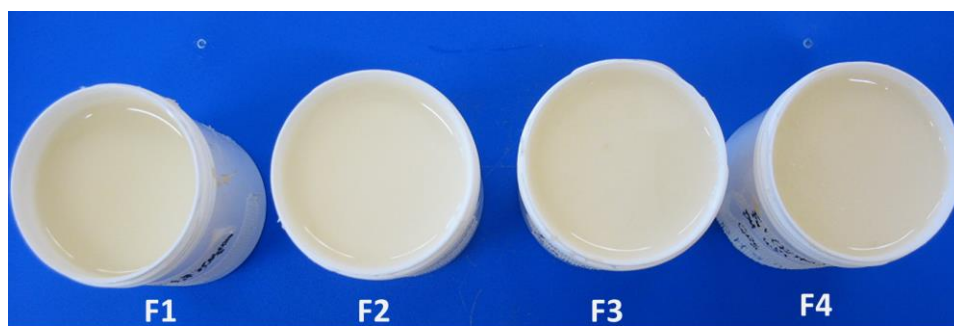

FIGURE S1: Macroscopic appearance of hydrogels with unmodified CS (F1, F2) or with bGP crosslinked CS (F3, F4) after preparation.

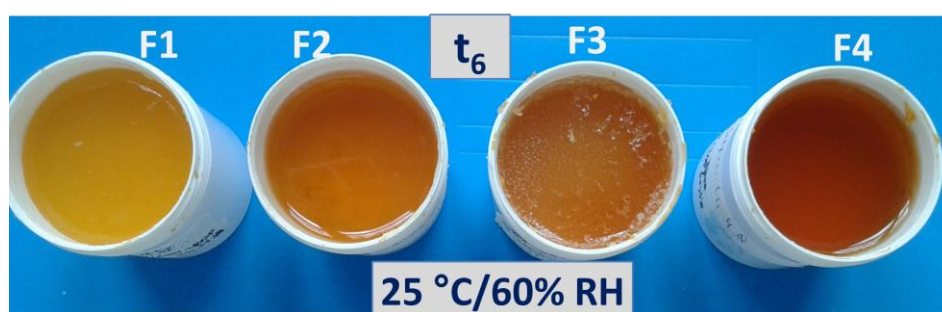

FIGURE S2: Macroscopic appearance of hydrogels with unmodified CS (F1, F2) or with bGP crosslinked CS (F3, F4) after 6-month storage at ambient conditions.

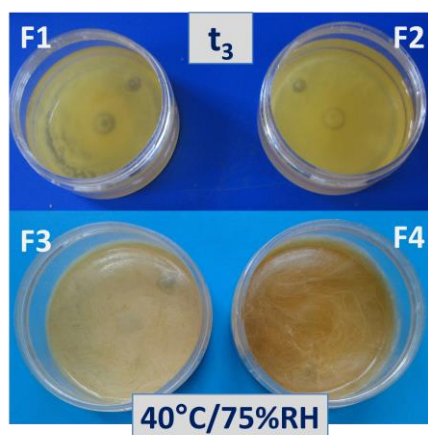

FIGURE S3: Macroscopic appearance of hydrogels with unmodified CS (F1, F2) or with bGP crosslinked CS (F3, F4) after 3-month storage at accelerated conditions.

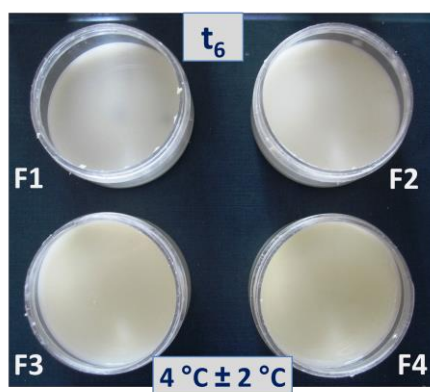

FIGURE S4: Macroscopic appearance of hydrogels with unmodified CS (F1, F2) or with bGP crosslinked CS (F3, F4) after 6-month storage at refrigerated conditions.
